# Supplementary material for: Subjective experiences of the first response to mental health crises in the community: a qualitative systematic review
Source: HighWire-hosted journal article supplement (doi:10.1136/bmjopen-2021-055393), 2022-02-01
Supplement: bmjopen-2021-055393supp001_data_supplement.pdf [file bmjopen-2021-055393supp001_data_supplement.pdf]

**Appendix 1. Search Strategy.**

|                                               |                                                                                                                                                                                                                                                                                                                                                                                                                                                                                                                                                                                                        |
|-----------------------------------------------|--------------------------------------------------------------------------------------------------------------------------------------------------------------------------------------------------------------------------------------------------------------------------------------------------------------------------------------------------------------------------------------------------------------------------------------------------------------------------------------------------------------------------------------------------------------------------------------------------------|
| <b>Mental health crisis</b>                   | <ol style="list-style-type: none"> <li>1. exp mental health/</li> <li>2. exp self harm/</li> <li>3. exp Attempted Suicide / or exp Suicide/ or suicide.mp.</li> <li>4. exp psychotic disorders/ or exp affective disorders, psychotic/</li> <li>5. exp mental illness/</li> <li>6.exp psychiatric disorder/</li> <li>7. (mental health emergency or mental health crisis).ab. or (mental health emergency or mental health crisis).ti.</li> <li>8. 1 or 2 or 3 or 4 or 5 or 6 or 7</li> </ol>                                                                                                          |
| <b>Non-mental health emergency responders</b> | <ol style="list-style-type: none"> <li>1. exp first responder/</li> <li>2. exp police/</li> <li>3. exp ambulance/</li> <li>4. (EMT or paramedic*).ab. or (EMT or paramedic*).ti.</li> <li>5. emergency responder.ab. or emergency responder.ti.</li> <li>6. (first responder or emergency responder or emergency medical technician).ab. or (first responder or emergency responder or emergency medical technician).ti.</li> <li>7. (rescue service or firefighter or fire fighter).ab. or (rescue service or firefighter or fire fighter).ti.</li> <li>8. 1 or 2 or 3 or 4 or 5 or 6 or 7</li> </ol> |
| <b>Qualitative design</b>                     | <p>((("semi-structured" or semistructured or unstructured or informal or "in-depth" or indepth or "face-to-face" or structured or guide) adj3 (interview* or discussion* or questionnaire*))).ti,ab. or (focus group* or qualitative or ethnograph* or fieldwork or "field work" or "key informant").ti,ab. or interviews as topic/ or focus groups/ or narration/ or qualitative research/</p> <p>Filter:<a href="https://libguides.sph.uth.tmc.edu/search_filters/ovid_medline_filters">https://libguides.sph.uth.tmc.edu/search_filters/ovid_medline_filters</a></p>                                |

Developed in Ovid MEDLINE(R).
